# Supplementary material
Source: PubMed Central journal article supplement (PMC3074444)
Supplement: supp_138.9.1675_DEV060210TableS1.pdf [file supp_138.9.1675_DEV060210TableS1.pdf]

Table S1. Primers (5' to 3')

|                                                                                             | Forward                                                        | Reverse                                                                | Expected band size (bp)          |
|---------------------------------------------------------------------------------------------|----------------------------------------------------------------|------------------------------------------------------------------------|----------------------------------|
| <b>Genotyping*</b>                                                                          |                                                                |                                                                        |                                  |
| <i>lft88</i>                                                                                | BY598: GCCTCCTGTTTCTTGACAACAGTG                                | BY919: GGTCTAACAAGTAAGCCAGTGTT<br>BY956: CTGCACCAGCCATTTCTCTAAGTCATGTA | loxP, 370; Wt, 350; null,<br>270 |
| <i>Cre</i>                                                                                  | BY1208: CCGTTTGCCGGTCTGGGGCGGCATGG                             | BY1209: CGCGCGGCTCCGACACGGGCACTG                                       | Cre <sup>+</sup> , 750           |
| <i>Kif3a</i>                                                                                | BY951: AGGGCAGACGGAAGGGTGG                                     | BY950: TCTGTGAGTTTGTGACCAGCC<br>BY952: TGGCAGGTCAATGGACGCAG            | loxP, 490; Wt, 360; null,<br>200 |
| <i>mTmG</i>                                                                                 | BY3010: CTCTGCTGCCTCCTGGCTTCT                                  | BY3011: CGAGGCGGATCACAAGCAATA<br>BY3012: TCAATGGGCGGGGGTCTGTT          | Wt, 330; transgene,<br>250       |
| <i>ROSA</i>                                                                                 | BY33: AGCAGAAGCCTGCGATGTC<br>BY1281: GGCTTAAAGGCTAACCTGATGTG   | BY34: GTCAGACGATTCATTGGCAC<br>BY1283: GGAGCGGGAGAAATGGATATG            | Wt, 374; <i>lacZ</i> , 300       |
| <i>Smo</i>                                                                                  | BY2110: AGTGCCTTGGTTCCGACAGAC<br>BY2112: GAGGTAAACCTAGGGCTTCTG | BY2111: TAGCCCACAAAACAAATGCCACTC<br>BY2113: CTGCCACGCTGTCAATACCG       | Wt, 372; <i>Smo</i> , 600        |
| <i>Ptch1-lacZ</i>                                                                           | BY3147: TGGGGTGGGATTAGATAAATGCC<br>BY3149: CTGCGGCAAGTTTTGGTTG | BY3148: TGTCTGTGTGTGCTCCTGAATCAC<br>BY3150: AGGGCTTCTCGTTGGCTACAAG     | Wt, 217; <i>Ptch1</i> , 501      |
| <b>qRT</b>                                                                                  |                                                                |                                                                        |                                  |
| <i>lft88</i>                                                                                | BY3617: TGGCCAACGACCTGGAGATTAACA                               | BY3616: ATAGCTGCTGGCTTGGGCAAATTC                                       |                                  |
| <i>Gli1</i>                                                                                 | BY3331: TCGACCTGCAAACCGTAATCC                                  | BY3332: TCCTAAAGAAGGGCTCATGGTA                                         |                                  |
| <i>Ptch1</i>                                                                                | BY1095: ATAACAGGCAATGGAAGTTGGAAC                               | BY1096: AATCTGGGTCGGCTGGGTTGAGGC                                       |                                  |
| <i>Gapdh</i>                                                                                | BY3271: GGGTGTGAACCACGAGAAAT                                   | BY3272: ACACATTGGGGGTAGGAACA                                           |                                  |
| <i>B2m</i>                                                                                  | BY3434: ATGAGGGAGATCGTGACAT                                    | BY3435: CCCCTGAGCGGACACTGT                                             |                                  |
| Wt, wild type.<br>*There can be one or two forward or reverse primers in certain reactions. |                                                                |                                                                        |                                  |
